# Supplementary material for: DNA Methylation Profiles of Tph1A and BDNF in Gut and Brain of L. Rhamnosus-Treated Zebrafish
Source: PubMed Central journal article supplement (PMC7911505; doi:10.3390/biom11020142), 2021-01-22

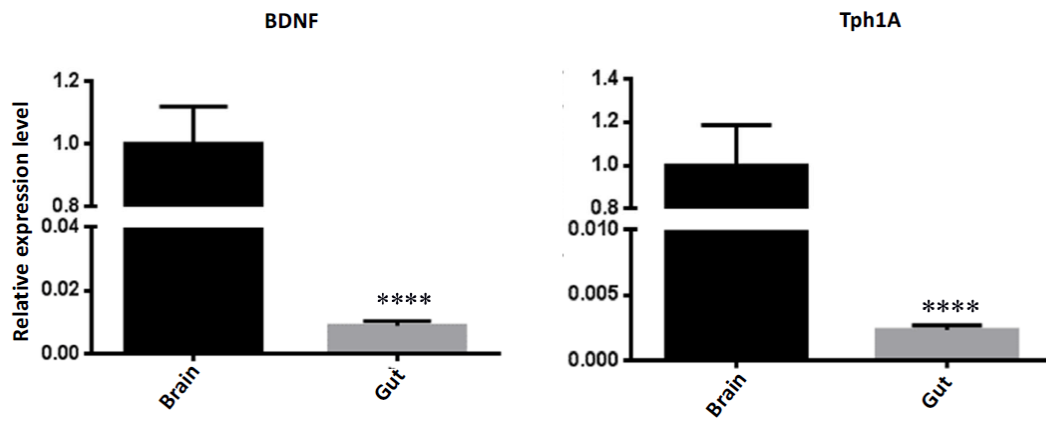

**Figure 1.** mRNA expression levels of BDNF and Tph1A genes in brain and gut of untreated Zebrafish.

**Table 1.** R values derived from correlation between behaviour and methylation at Tph1A gene.

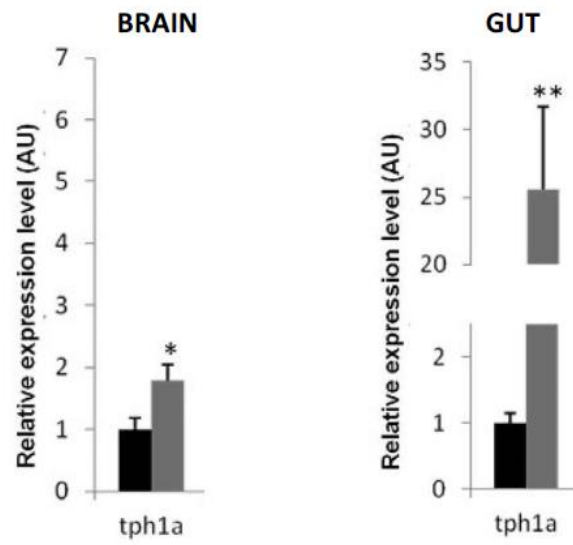

Supplement: biomolecules-11-00142-s001.pdf [file biomolecules-11-00142-s001.pdf]
